# Supplementary material
Source: PubMed Central journal article supplement (PMC5061543)
Supplement: supp_the2016-0097_Supplemental_Figures.pdf [file supp_the2016-0097_Supplemental_Figures.pdf]

Supplemental Figures for:  
 Palbociclib in Combination With Fulvestrant in Women With Hormone Receptor–Positive/HER2-Negative Advanced Metastatic Breast Cancer: Detailed Safety Analysis From a Multicenter, Randomized, Placebo-Controlled, Phase 3 Study (PALOMA-3)  
 Sunil Verma et al.

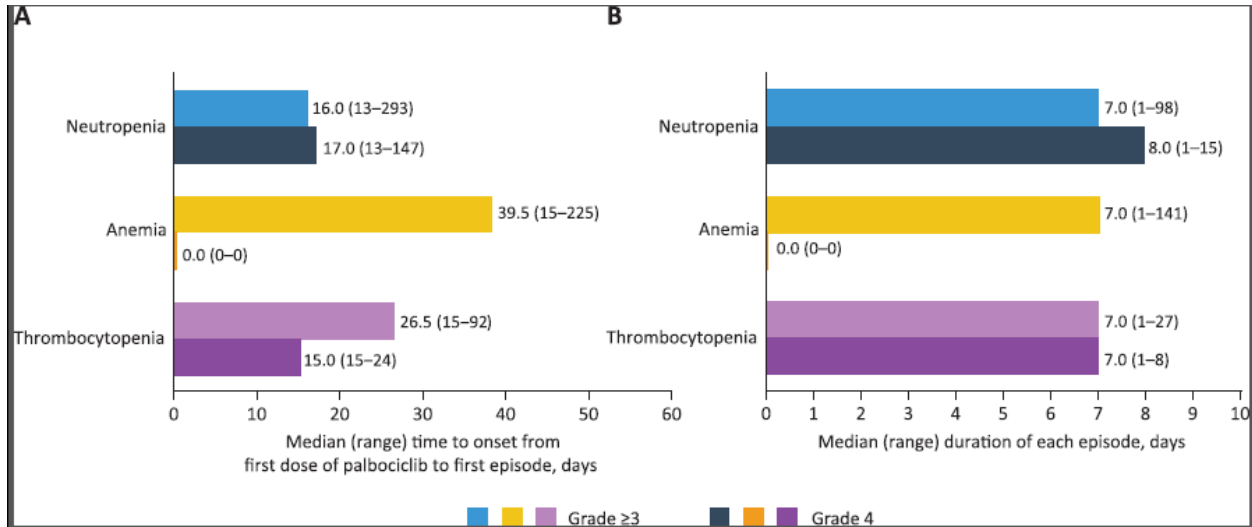

**Figure S1.** (A) Time to onset of hematologic toxicity in the palbociclib plus fulvestrant arm only and (B) duration of each episode by grade analysis based on laboratory data. Includes patients with postbaseline CTCAEs grade >0 and greater than baseline CTCAE grade. Percentages are based on number of episodes in each subgroup. For multiple time to recovery periods within a patient, an average was calculated prior to summarizing among patients.

Abbreviations: CTCAE, Common Terminology Criteria for Adverse Events.

Supplemental Figures for:  
 Palbociclib in Combination With Fulvestrant in Women With Hormone Receptor–Positive/HER2–Negative Advanced Metastatic Breast Cancer: Detailed Safety Analysis From a Multicenter, Randomized, Placebo–Controlled, Phase 3 Study (PALOMA-3)  
 Sunil Verma et al.

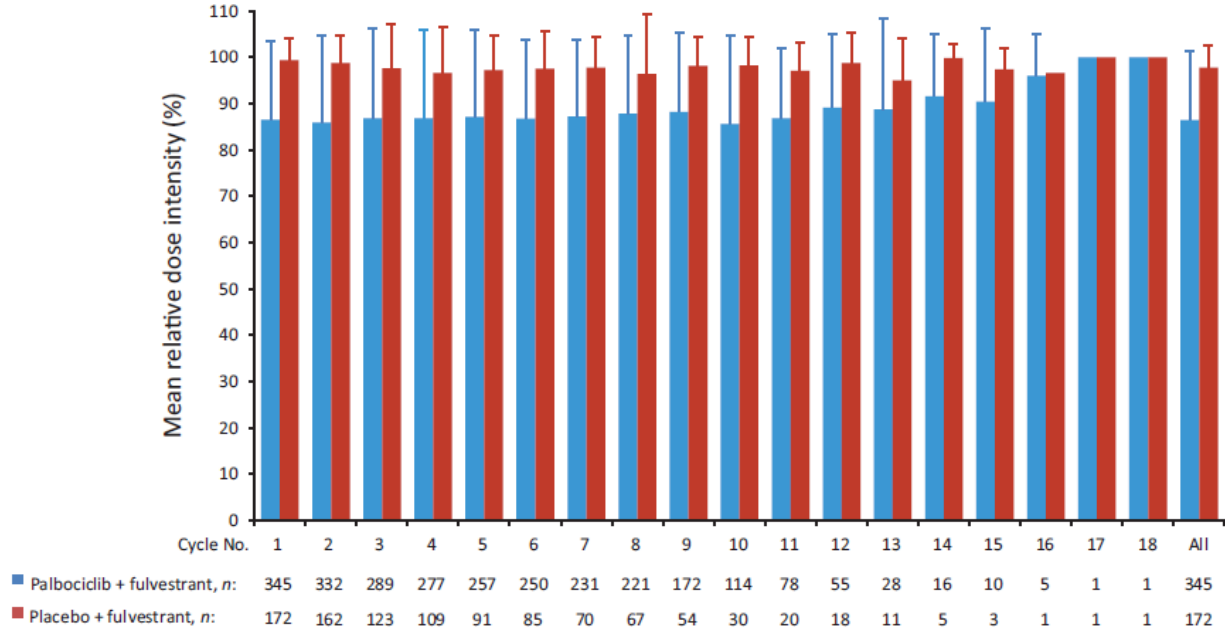

**Figure S2.** Mean relative dose intensities for treatment arms by cycle number. Dose intensity was defined as the actual dose intensity divided by the intended dose intensity multiplied by 100%.

Supplemental Figures for:  
 Palbociclib in Combination With Fulvestrant in Women With Hormone Receptor–Positive/HER2-Negative Advanced Metastatic Breast Cancer: Detailed Safety Analysis From a Multicenter, Randomized, Placebo-Controlled, Phase 3 Study (PALOMA-3)  
 Sunil Verma et al.

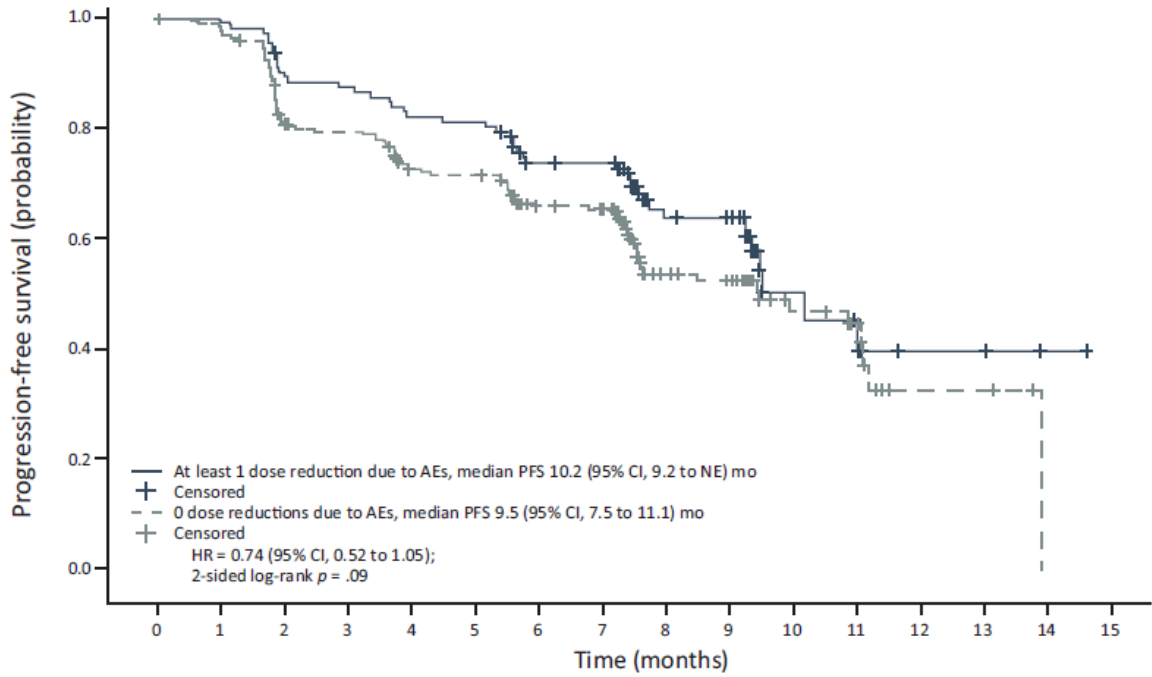

| Patients at risk          |     | 0   | 1   | 2   | 3   | 4   | 5   | 6   | 7  | 8  | 9  | 10 | 11 | 12 | 13 | 14 | 15 |
|---------------------------|-----|-----|-----|-----|-----|-----|-----|-----|----|----|----|----|----|----|----|----|----|
| At least 1 dose reduction | 114 | 112 | 101 | 98  | 92  | 91  | 76  | 75  | 42 | 40 | 10 | 8  | 3  | 3  | 1  | 0  |    |
| 0 dose reduction          | 231 | 221 | 180 | 175 | 155 | 153 | 126 | 122 | 49 | 45 | 22 | 15 | 4  | 4  | 0  |    |    |

**Figure S3.** Kaplan-Meier plot of patients in the palbociclib plus fulvestrant arm who had at least 1 dose reduction because of adverse events ( $n = 114$ ) vs no dose reduction ( $n = 231$ ).  
 Abbreviation: NE, not estimable.
