# Supplementary material
Source: PubMed Central journal article supplement (PMC5061543)
Supplement: supp_the2016-0097_Supplemental_Tables.pdf [file supp_the2016-0097_Supplemental_Tables.pdf]

Supplemental Figures for:

Palbociclib in Combination With Fulvestrant in Women With Hormone Receptor–Positive/HER2-Negative Advanced Metastatic Breast Cancer: Detailed Safety Analysis  
From a Multicenter, Randomized, Placebo-Controlled, Phase 3 Study (PALOMA-3)

Sunil Verma et al

**Table S1.** Summary of treatment-emergent serious adverse events (>1 case, all causalities): as-treated population<sup>a</sup>

| Preferred term, <sup>b</sup><br>n (%) | Palbociclib + fulvestrant (N = 345) |         |          |         |         |           | Placebo + fulvestrant (N = 172) |         |          |         |         |           |
|---------------------------------------|-------------------------------------|---------|----------|---------|---------|-----------|---------------------------------|---------|----------|---------|---------|-----------|
|                                       | Grade 1                             | Grade 2 | Grade 3  | Grade 4 | Grade 5 | Any Grade | Grade 1                         | Grade 2 | Grade 3  | Grade 4 | Grade 5 | Any Grade |
| Any adverse event                     | 1 (0.3)                             | 8 (2.3) | 24 (7.0) | 7 (2.0) | 4 (1.2) | 44 (12.8) | 0                               | 8 (4.7) | 16 (9.3) | 3 (1.7) | 3 (1.7) | 30 (17.4) |
| Infections <sup>c</sup>               | 0                                   | 2 (0.6) | 4 (1.2)  | 1 (0.3) | 0       | 7 (2.0)   | 0                               | 3 (1.7) | 4 (2.3)  | 0       | 0       | 7 (4.1)   |
| Neutropenia <sup>c</sup>              | 0                                   | 0       | 2 (0.6)  | 2 (0.6) | 0       | 4 (1.2)   | 0                               | 0       | 0        | 0       | 0       | 0         |
| Pyrexia                               | 3 (0.9)                             | 0       | 1 (0.3)  | 0       | 0       | 4 (1.2)   | 1 (0.6)                         | 0       | 0        | 0       | 0       | 1 (0.6)   |
| Pulmonary embolism <sup>c</sup>       | 0                                   | 0       | 3 (0.9)  | 0       | 0       | 3 (0.9)   | 0                               | 0       | 0        | 0       | 0       | 0         |
| Pleural effusion                      | 0                                   | 2 (0.6) | 1 (0.3)  | 0       | 0       | 3 (0.9)   | 0                               | 2 (1.2) | 1 (0.6)  | 0       | 0       | 3 (1.7)   |
| Deep vein thrombosis                  | 0                                   | 1 (0.3) | 1 (0.3)  | 0       | 0       | 2 (0.6)   | 0                               | 0       | 0        | 0       | 0       | 0         |
| Disease progression                   | 0                                   | 0       | 0        | 0       | 2 (0.6) | 2 (0.6)   | 0                               | 0       | 0        | 0       | 0       | 0         |
| Febrile neutropenia                   | 0                                   | 0       | 2 (0.6)  | 0       | 0       | 2 (0.6)   | 0                               | 0       | 0        | 0.6     | 0       | 1 (0.6)   |
| Suicide attempt                       | 0                                   | 0       | 1 (0.3)  | 1 (0.3) | 0       | 2 (0.6)   | 0                               | 0       | 0        | 0       | 0       | 0         |
| Pneumonia                             | 0                                   | 0       | 1 (0.3)  | 0       | 0       | 1 (0.3)   | 0                               | 1 (0.6) | 1 (0.6)  | 0       | 0       | 2 (1.2)   |
| Ascites                               | 0                                   | 0       | 0        | 0       | 0       | 0         | 0                               | 0       | 3 (1.7)  | 0       | 0       | 3 (1.7)   |
| Pathologic fracture                   | 0                                   | 0       | 0        | 0       | 0       | 0         | 0                               | 0       | 1 (0.6)  | 1 (0.6) | 0       | 2 (1.2)   |

<sup>a</sup>Includes data up to 28 days after last dose of study drug.

<sup>b</sup>Adverse events were graded in accordance with Common Terminology Criteria for Adverse Events version 4.0 and the Medical Dictionary for Regulatory Activities version 18.0 (MedDRA).

<sup>c</sup>Preferred terms (PTs) are listed according to MedDRA. Infection includes any reported PTs that are part of the System Organ Class infections and infestations. Neutropenia includes the following PTs: neutropenia, neutrophil count decreased. Pulmonary embolism includes the following PTs: pulmonary artery thrombosis, pulmonary embolism.

Supplemental Figures for:

Palbociclib in Combination With Fulvestrant in Women With Hormone Receptor–Positive/HER2-Negative Advanced Metastatic Breast Cancer: Detailed Safety Analysis  
From a Multicenter, Randomized, Placebo-Controlled, Phase 3 Study (PALOMA-3)

Sunil Verma et al

Supplemental Figures for:

Palbociclib in Combination With Fulvestrant in Women With Hormone Receptor–Positive/HER2–Negative Advanced Metastatic Breast Cancer: Detailed Safety Analysis From a Multicenter, Randomized, Placebo–Controlled, Phase 3 Study (PALOMA-3)

Sunil Verma et al

**Table S2. Multivariate analysis of grade 3 and/or 4 neutropenia<sup>a</sup> vs infection status,<sup>b</sup> treatment arm, and key baseline factors**

| Factors <sup>c</sup>                          | Odds ratio <sup>d</sup> | 95% CI           | <i>p</i> value |
|-----------------------------------------------|-------------------------|------------------|----------------|
| Infection status, no vs yes                   | 0.682                   | 0.396–1.174      | .17            |
| Treatment arm, palbociclib arm vs placebo arm | >999.999                | 151.036–>999.999 | <.0001         |
| Immediate prior chemotherapy, no vs yes       | 0.643                   | 0.243–1.700      | .37            |
| Age, y                                        |                         |                  |                |
| 50–70 vs ≥70                                  | 1.300                   | 0.690–2.451      | .83            |
| <50 vs ≥70                                    | 1.503                   | 0.632–3.574      | .46            |
| ECOG PS, 0 vs 1                               | 0.963                   | 0.558–1.663      | .89            |
| Number of disease sites                       |                         |                  |                |
| 1 vs ≥3                                       | 0.858                   | 0.459–1.604      | .42            |
| 2 vs ≥3                                       | 1.174                   | 0.616–2.237      | .43            |
| Race, Asian vs Non-Asian                      | 10.972                  | 4.355–27.645     | <.0001         |
| Bone metastasis, no vs yes                    | 0.840                   | 0.464–1.520      | .56            |
| Baseline ANC, <median value vs ≥median value  | 7.223                   | 4.088–12.761     | <.0001         |

<sup>a</sup>Neutropenia, any event having a PT equivalent to neutropenia/neutrophil count decreased; <sup>b</sup>Infections, any event having a PT part of the SOC infections and infestations. <sup>c</sup>Controlled for baseline/prognostic factors and treatment arm simultaneously in multivariate analysis. <sup>d</sup>An odds ratio of A:B (ie, A vs B) >1 with a *p* value <.05 means that the level A of a specific variable is significantly associated with the increased probability of experiencing grade 3–4 neutropenia compared with level B of the same variable in this multivariate analysis.

Abbreviations: ANC, absolute neutrophil count; ECOG PS, Eastern Cooperative Oncology Group performance status; PT, preferred term; SOC, System Organ Class.

Supplemental Figures for:

Palbociclib in Combination With Fulvestrant in Women With Hormone Receptor–Positive/HER2-Negative Advanced Metastatic Breast Cancer: Detailed Safety Analysis From a Multicenter, Randomized, Placebo-Controlled, Phase 3 Study (PALOMA-3)

Sunil Verma et al
